# Supplementary material for: Freeze-thaw cycles enable a prebiotically plausible and continuous pathway from nucleotide activation to nonenzymatic RNA copying
Source: PubMed Central journal article supplement (PMC9169909; doi:10.1073/pnas.2116429119), 2022-04-21
Supplement: pnas.2116429119.sapp.pdf [file pnas.2116429119.sapp.pdf]

## **Supplementary Information for** **Freeze-thaw Cycles Enable a Prebiotically Plausible and Continuous** **Pathway from Nucleotide Activation to Nonenzymatic RNA Copying**

Stephanie J. Zhang<sup>1,2</sup>, Daniel Duzdevich<sup>2,3</sup>, Dian Ding<sup>1,2</sup>, and Jack W. Szostak<sup>1,2,3\*</sup>

<sup>1</sup> Department of Chemistry and Chemical Biology, Harvard University, 12 Oxford Street, Cambridge, Massachusetts 02138, United States; <sup>2</sup> Department of Molecular Biology, Center for Computational and Integrative Biology, Massachusetts General Hospital, Boston, MA 02114, United States of America; <sup>3</sup> Howard Hughes Medical Institute, Massachusetts General Hospital, Boston, MA 02114, United States of America

\* Jack W. Szostak

**Email:** [szostak@molbio.mgh.harvard.edu](mailto:szostak@molbio.mgh.harvard.edu)

### **This PDF file includes:**

Figures S1 to S7  
References

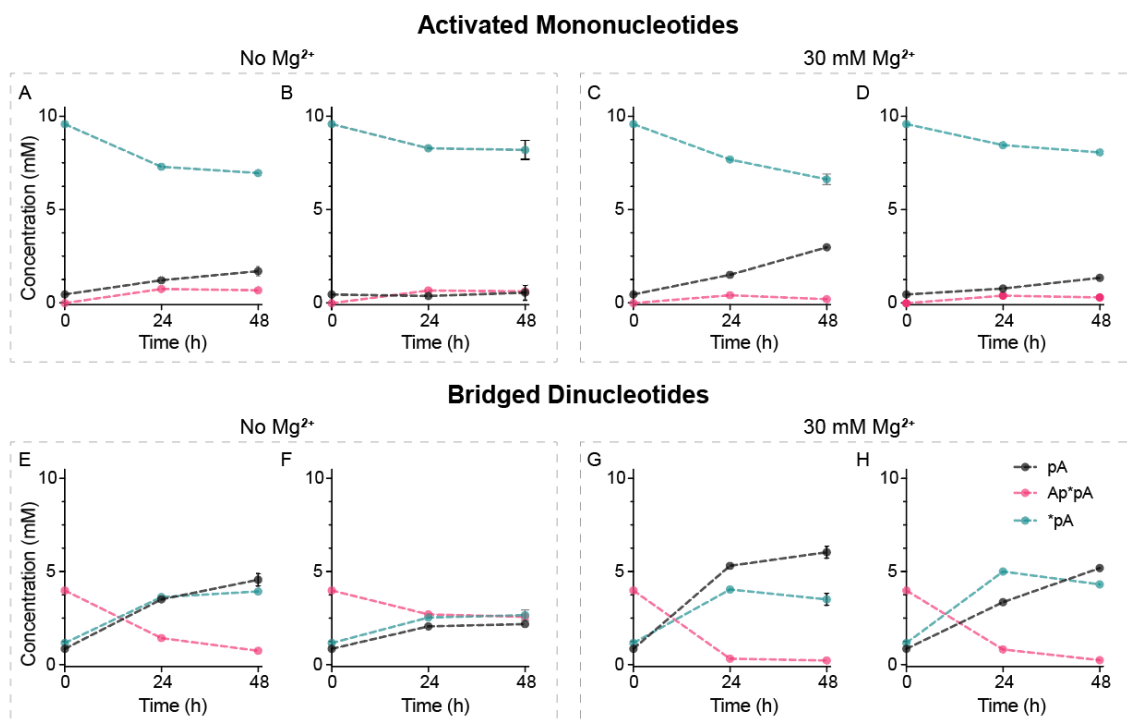

**Figure S1.** Activated nucleotides (\*pA) are less susceptible to hydrolysis under ice eutectic conditions at  $-13\text{ }^{\circ}\text{C}$  compared to room temperature. In the absence of  $\text{Mg}^{2+}$ , more \*pA hydrolyzed to pA at (A) room temperature compared to (B) ice eutectic phase. A similar level of bridged dinucleotides is formed under either condition. With  $30\text{ mM Mg}^{2+}$ , more \*pA hydrolyzed to pA at (C) room temperature compared to (D) ice eutectic phase. In addition, the presence of  $\text{Mg}^{2+}$  accelerated the hydrolysis either under room temperature (compare (A) and (C)) or ice eutectic phase (compare (B) and (D)). In the absence of  $\text{Mg}^{2+}$ , there is almost no Ap\*pA left under (E) room temperature while over 50% of Ap\*pA remained under (F) ice eutectic phase. The presence of  $30\text{ mM Mg}^{2+}$  significantly increased the hydrolysis rate of Ap\*pA under either (G) room temperature or (H) ice eutectic phase. However, importantly, at the 24-hr timepoint, less Ap\*pA has been hydrolyzed under the ice eutectic phase (H) compared to (G) room temperature. Note that the effective concentration of  $\text{Mg}^{2+}$  in the ice eutectic phase might be much higher than  $30\text{ mM}$ . *Reaction conditions:*  $10\text{ mM }^*\text{pA}$ ,  $200\text{ mM Na}^+\text{-HEPES}$  at pH 8 under (A) room temperature and (B) ice eutectic phase at  $-13\text{ }^{\circ}\text{C}$ .  $10\text{ mM }^*\text{pA}$ ,  $30\text{ mM Mg}^{2+}$ ,  $200\text{ mM Na}^+\text{-HEPES}$  at pH 8 under (C) room temperature and (D) ice eutectic phase.  $10\text{ mM Ap}^*\text{pA}$ ,  $200\text{ mM Na}^+\text{-HEPES}$  at pH 8 under (E) room temperature and (F) ice eutectic phase.  $10\text{ mM Ap}^*\text{pA}$ ,  $30\text{ mM Mg}^{2+}$ ,  $200\text{ mM Na}^+\text{-HEPES}$  at pH 8 under (G) room temperature and (H) ice eutectic phase. Errors are standard deviations of the mean,  $n \geq 2$  replicates.

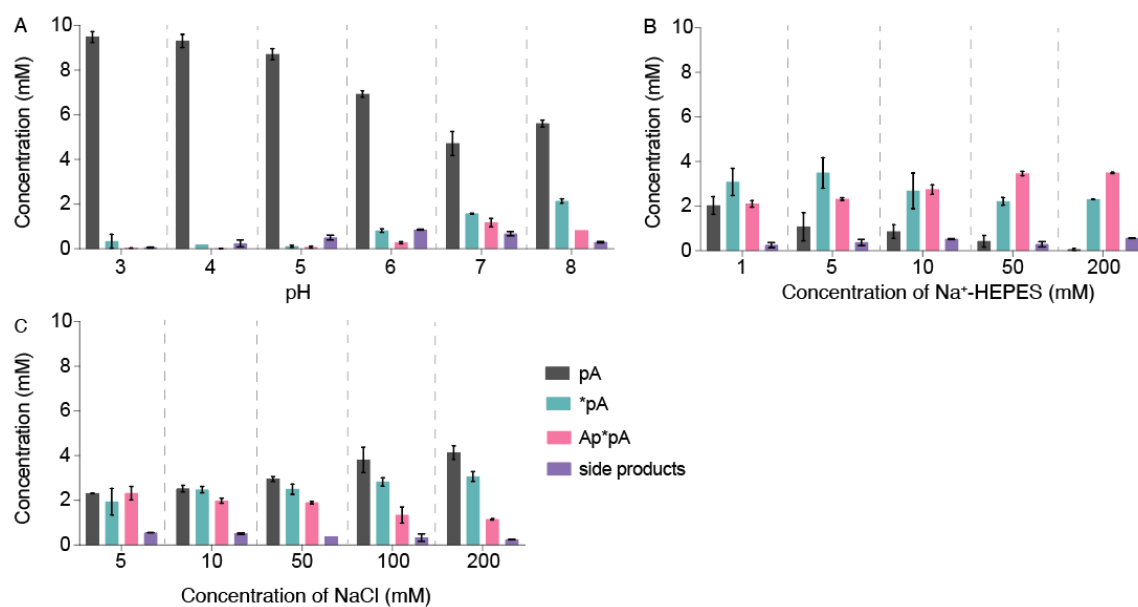

**Figure S2.** The importance of pH effects under ice eutectic phase. (A) Eutectic activation was performed across a range of initial pH values (3 to 8). The solution was brought to the indicated pH by addition of concentrated HCl or NaOH. No buffering agent was used. The optimal initial pH is 7. The low yields of activation compared to the case in which Na<sup>+</sup>-HEPES buffer is used (compare to (B)) suggests that the initial adjustment of the pH is not sufficient to regulate the pH during the incubation under ice eutectic phase. (B) Increasing Na<sup>+</sup>-HEPES (up to 200 mM) increased the activation yield. Note that significant activation is observed with only 1 mM Na<sup>+</sup>-HEPES, much less than the concentrations of MeNC and 2MBA, suggesting that Na<sup>+</sup>-HEPES is not actively participating in the isocyanide activation. (Note that the imidazolide moiety of 2AI can provide buffering, however, 2AI is consumed during the reaction over time.) (C) To confirm that the increase in reaction yield in the presence of Na<sup>+</sup>-HEPES is not due to a simple salt effect, we titrated NaCl into the reaction. Increasing the concentration of NaCl leads to an opposite trend compared to that observed when increasing Na<sup>+</sup>-HEPES, suggesting that simple ionic effects are not responsible for facilitating the reaction. We note that chloride can strongly affect the pH in the eutectic phase since it is retained in the ice, drawing H<sup>+</sup> into the ice for charge balance, making the liquid phase more alkaline.<sup>1</sup> *Reaction conditions:* all experiments were performed using the same approach with four cycles as optimized for pA and shown in Figure 1D. (A) 10 mM pA, 10 mM 2AI, 100 mM 2MBA, 30 mM MgCl<sub>2</sub>, 50 mM MeNC plus periodic addition of the MeNC under ice eutectic phase. (B) 10 mM pA, 10 mM 2AI, 100 mM 2MBA, 30 mM MgCl<sub>2</sub>, 50 mM MeNC plus periodic addition of the MeNC, with indicated Na<sup>+</sup>-HEPES concentration at pH 8 under ice eutectic phase. (C) 10 mM pA, 10 mM 2AI, 100 mM 2MBA, 30 mM MgCl<sub>2</sub>, 50 mM MeNC plus periodic addition of the MeNC, 5 mM Na<sup>+</sup>-HEPES pH 8, and indicated amount of NaCl under ice eutectic phase. Errors are standard deviations of the mean, n ≥ 2 replicates.

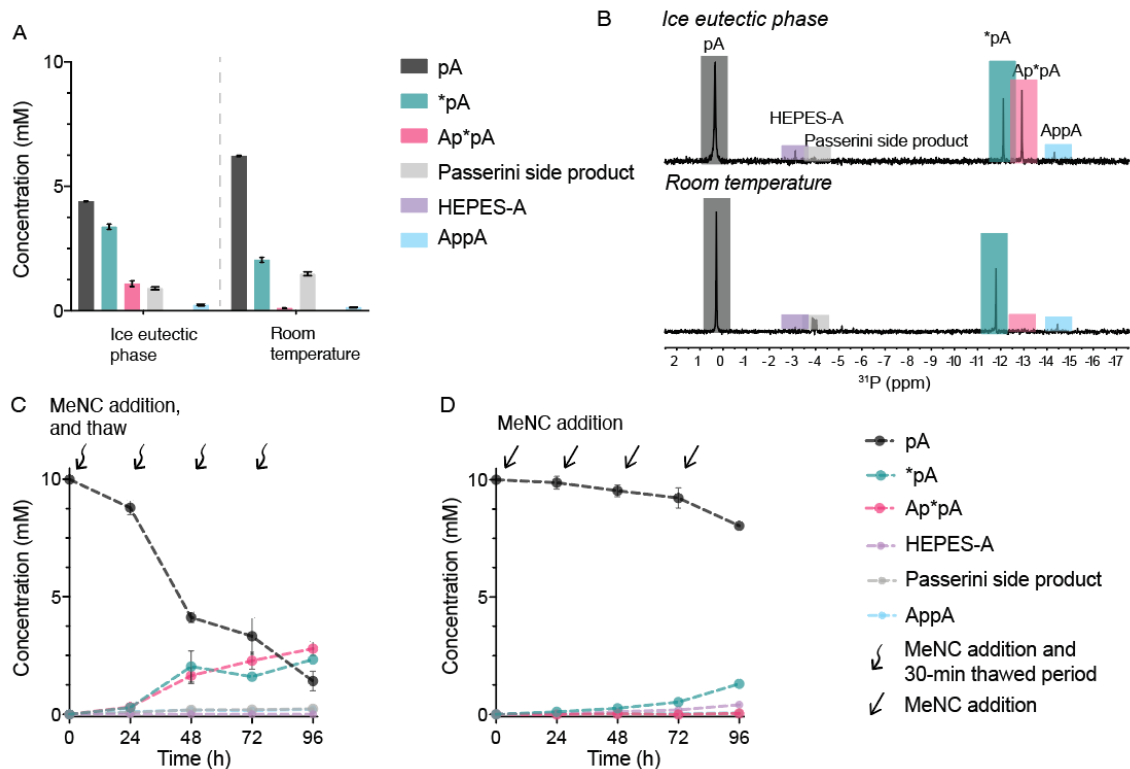

**Figure S3.** Ice eutectic phase significantly enhances the yield of activated nucleotides (\*pN) and promotes formation of bridged dinucleotides (Np\*pN). The same data as in Figure 1 C-E, but with a complete breakdown of the identities of the side products. (A) Effect of ice eutectic phase on nucleotide activation. Nucleotide activation at ice eutectic phase (left) and room temperature (right) with one round of MeNC addition and equimolar concentrations of initially unactivated nucleotides and 2AI. (B) Representative NMR spectra of (A). (C) Cycles of MeNC addition and eutectic freezing drive significant nucleotide activation. Controlled addition of MeNC to the thawed solution enhances the yield of activated nucleotides (\*pA). The curly arrows indicate the addition of MeNC after thawing of the reaction mixture. Note that the reaction mixture is frozen as eutectic ice for the entire reaction course except during the brief thawing steps (~30 minutes at room temperature for the mixture to thaw completely). (D) Activation is inefficient in the absence of ice eutectic freezing, at room temperature. The straight arrows indicate the addition of MeNC at room temperature. *Reaction conditions:* 10 mM pA, 10 mM 2AI, 100 mM 2MBA, 30 mM MgCl<sub>2</sub>, 50 mM Na<sup>+</sup>-HEPES pH 8, plus (A) one addition of 200 mM MeNC under ice eutectic phase or room temperature, or (C) periodic addition of the MeNC beyond the initial 50 mM in three aliquots of 50 mM each under ice eutectic phase at -13 °C or (D) at room temperature. Errors are standard deviations of the mean, n ≥ 2 replicates.

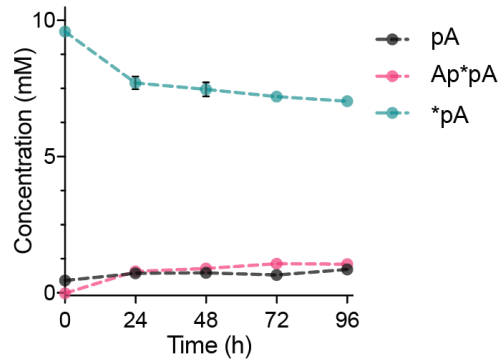

**Figure S4.** Spontaneous bridged dinucleotide formation from pure activated nucleotide (\*pA) under ice eutectic phase. The concentration of bridged dinucleotides (Ap\*pA) slowly increased over time as 10 mM of \*pA was incubated under ice eutectic phase in the absence of isocyanide-driven activation chemistry (Figure S3B). The reaction mixture was under ice eutectic phase conditions except during the four brief thawing steps to make measurements. *Reaction conditions:* 10 mM \*pA, 50 mM Na<sup>+</sup>-HEPES pH 8, 30 mM MgCl<sub>2</sub>, under ice eutectic phase. Errors are standard deviations of the mean, n = 2 replicates.

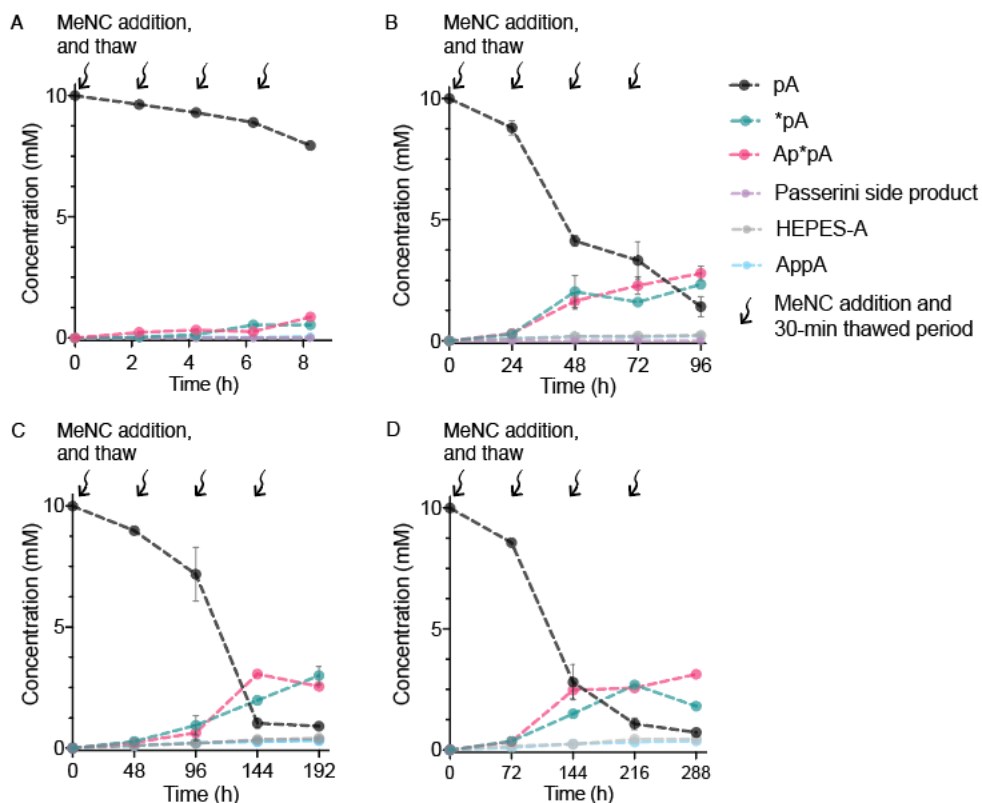

**Figure S5.** The frequency of MeNC delivery at long time intervals does not affect the overall yield of activated products. The same data as in Figure 2, but with a complete breakdown of the identities of the side products. (A) Yields of activated species are low with time intervals on the order of hours in between MeNC additions. (B-D) However, lengthening of the time interval beyond 24 hours does not significantly affect the final yield. The complete product breakdown is included in Figure S5. *Reaction conditions:* 10 mM pA, 10 mM 2AI, 100 mM 2MBA, 50 mM MeNC, 30 mM MgCl<sub>2</sub>, 50 mM Na<sup>+</sup>-HEPES pH 8, and subsequent periodic addition of MeNC in three aliquots of 50 mM. Errors are standard deviations of the mean, n ≥ 2 replicates.

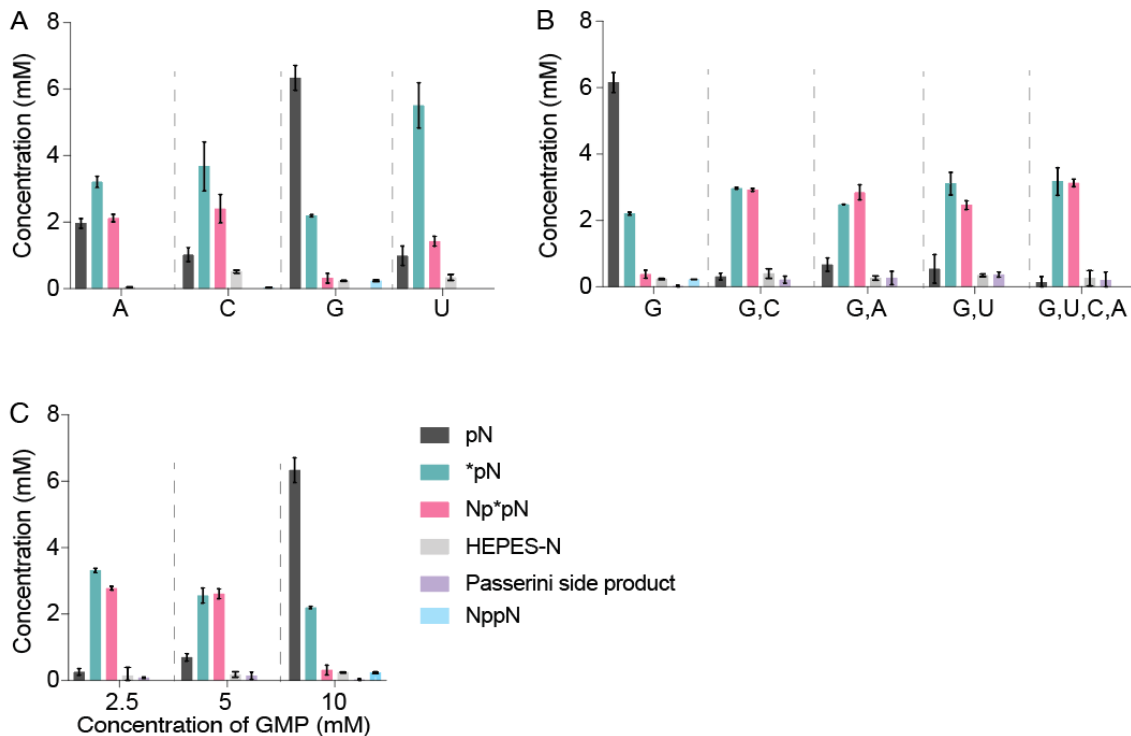

**Figure S6.** Efficient eutectic ice phase activation of all four canonical nucleotides. The same data as in Figure 3, but with a complete breakdown of the identities of the side products. (A) Each of the four canonical ribonucleotides could be activated using the same approach as optimized for pA in Figure 1D. However, pG exhibited lower activation compared to the other three. 10 mM pN, 10 mM 2AI, 100 mM 2MBA, 50 mM MeNC, 30 mM MgCl<sub>2</sub>, 50 mM Na<sup>+</sup>-HEPES pH 8, and periodic addition of MeNC in three aliquots of 50 mM each. (B) All four nucleotides can be activated to almost full yield with minimal side products when incubated simultaneously. Indicated concentrations are sum totals across all the nucleotides. Total [pN] = 10 mM, 10 mM 2AI, 100 mM 2MBA, 50mM MeNC, 30 mM MgCl<sub>2</sub>, 50 mM Na<sup>+</sup>-HEPES pH 8, and periodic addition of MeNC in three aliquots of 50 mM each. (C) GMP activation yields decrease as GMP concentration is increased, suggesting that its low activation is partly due to its low solubility in aqueous phase. Total [pN] = 10 mM, 10 mM 2AI, 100 mM 2MBA, 50 mM MeNC, 30 mM MgCl<sub>2</sub>, 50 mM Na<sup>+</sup>-HEPES pH 8, and periodic addition of MeNC in three aliquots of 50mM each. Errors are standard deviations of the mean, n ≥ 2 replicates.

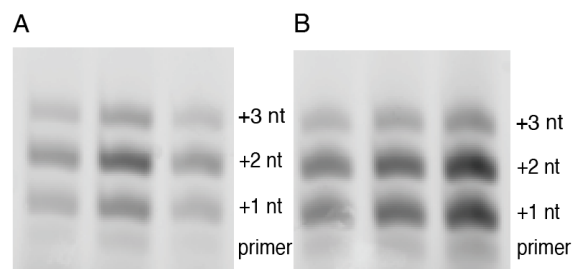

**Figure S7.** Eutectic ice phase completes a pathway from unactivated mononucleotides through activation to primer extension. Replicates of primer extension reactions using (A) pure activated mononucleotides (5 mM \*pG and 5 mM \*pC) under room temperature and (B) pNs (pN = pC and pG) generated with isocyanide activation chemistry under ice eutectic phase. Positions of primer and +1 to +3-nucleotide (nt) extension products, which represents +C, +CG, +CGG, are indicated.

*Reaction conditions:* (A) 5 mM \*pG and 5 mM \*pC were added to 1  $\mu$ M primer, 1.5  $\mu$ M template, 200 mM Na<sup>+</sup>-HEPES pH 8.0, and 30 mM MgCl<sub>2</sub>. (B) 1  $\mu$ M primer and 1.5  $\mu$ M template were added to a mixture of 10 mM pN, 10 mM 2AI, 100 mM 2MBA, 30 mM MgCl<sub>2</sub>, 50 mM Na<sup>+</sup>-HEPES pH 8, after four cycles of eutectic phase activation (50 mM MeNC each addition).



## References

1. Hayyan, A.; Mjalli, F. S.; AlNashef, I. M.; Al-Wahaibi, T.; Al-Wahaibi, Y. M.; Hashim, M. A., Fruit sugar-based deep eutectic solvents and their physical properties. *Thermochim Acta* **2012**, *541*, 70-75.
